# Supplementary material for: Synthesis, Characterization, Antibacterial Activity, and Computer-Aided Design of Novel Quinazolin-2,4-dione Derivatives as Potential Inhibitors Against Vibrio cholerae
Source: PubMed Central journal article supplement (PMC6945456; doi:10.1177/1176934319897596), 2020-01-06
Supplement: Supplementary__File.pdf [file Supplementary__File.pdf]

## Supplementary information

### Table of Contents

| List of Contents                                          | Page no. |
|-----------------------------------------------------------|----------|
| Figure S1. <sup>1</sup> H-NMR of compound 1               | 2        |
| Figure S2. <sup>13</sup> C-NMR of compound 1              | 2        |
| Figure S3. MS of compound 1                               | 2        |
| Figure S4. <sup>1</sup> H-NMR of compound 2               | 3        |
| Figure S5. <sup>13</sup> C-NMR of compound 2              | 3        |
| Figure S6. MS of compound 2                               | 3        |
| Figure S7. <sup>1</sup> H-NMR of compound 3               | 4        |
| Figure S8. <sup>1</sup> H-NMR of compound 4               | 4        |
| Figure S9. IR of compound 5                               | 4        |
| Figure S10. <sup>1</sup> H-NMR of compound 5              | 5        |
| Figure S11. <sup>1</sup> H-NMR of compound 6              | 5        |
| Figure S12. <sup>13</sup> C of compound 6                 | 6        |
| Figure S13. <sup>1</sup> H of compound 7                  | 6        |
| Figure S14. <sup>13</sup> C of compound 7                 | 6        |
| Figure S15. <sup>1</sup> H of compound 8                  | 7        |
| Figure S16. <sup>13</sup> C of compound 8                 | 7        |
| Figure S17. MS of compound 8                              | 7        |
| Figure S18. Minimum inhibitory concentration (MIC) method | 8-9      |

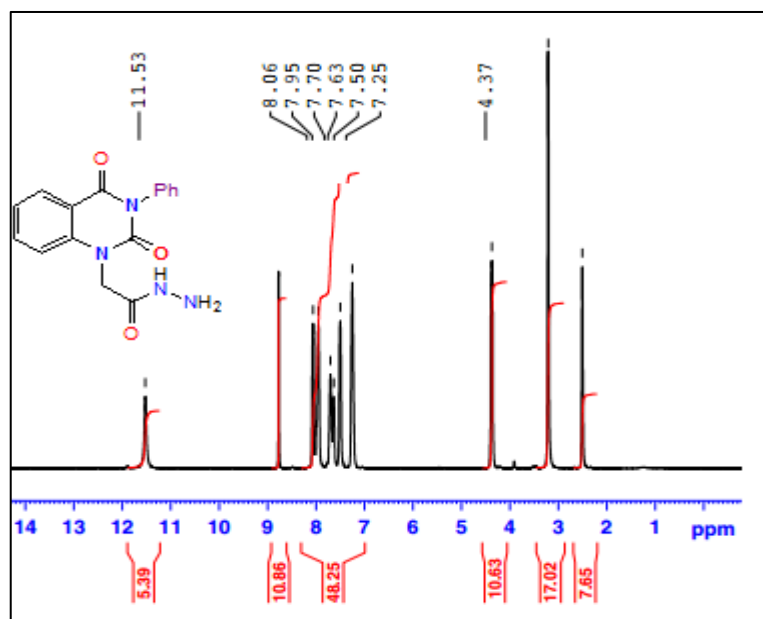

Figure S1. <sup>1</sup>H-NMR of compound 1

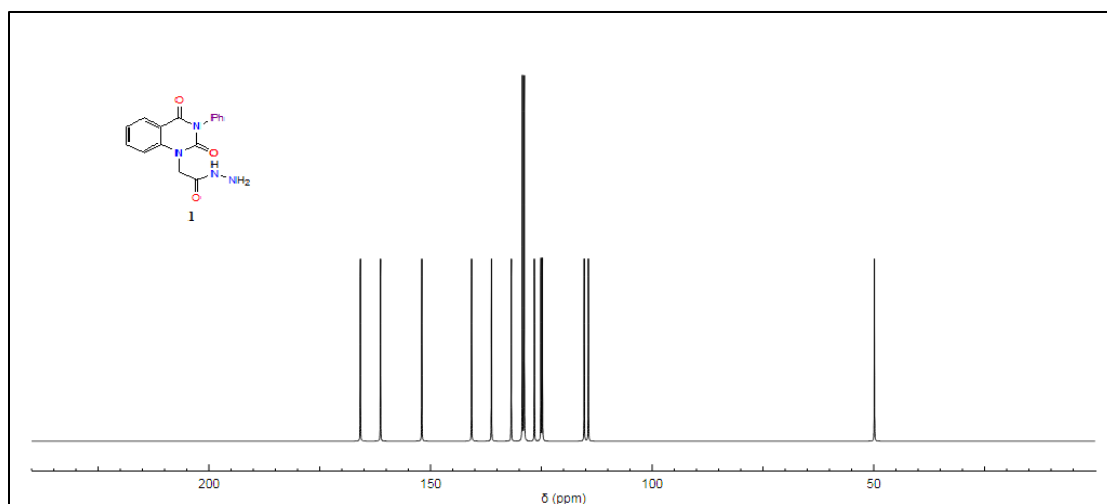

**Figure S2.**  $^{13}\text{C}$ -NMR of compound 1

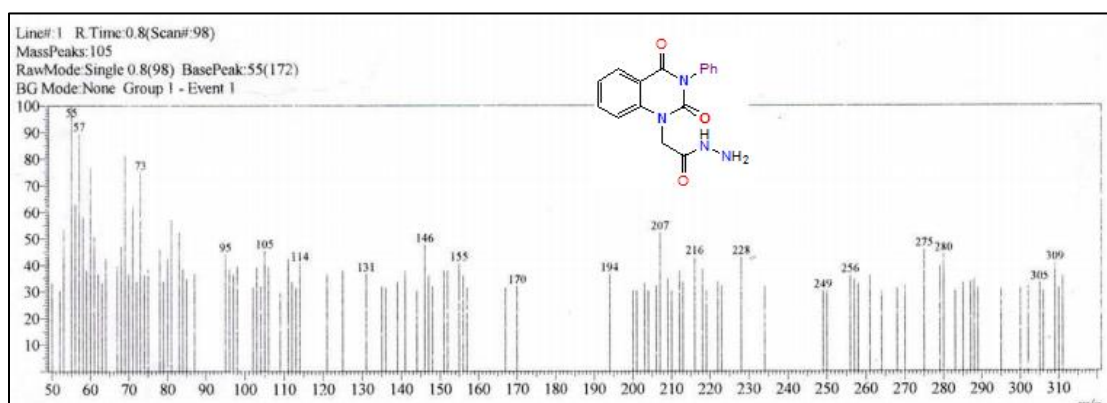

**Figure S3.** MS of compound 1

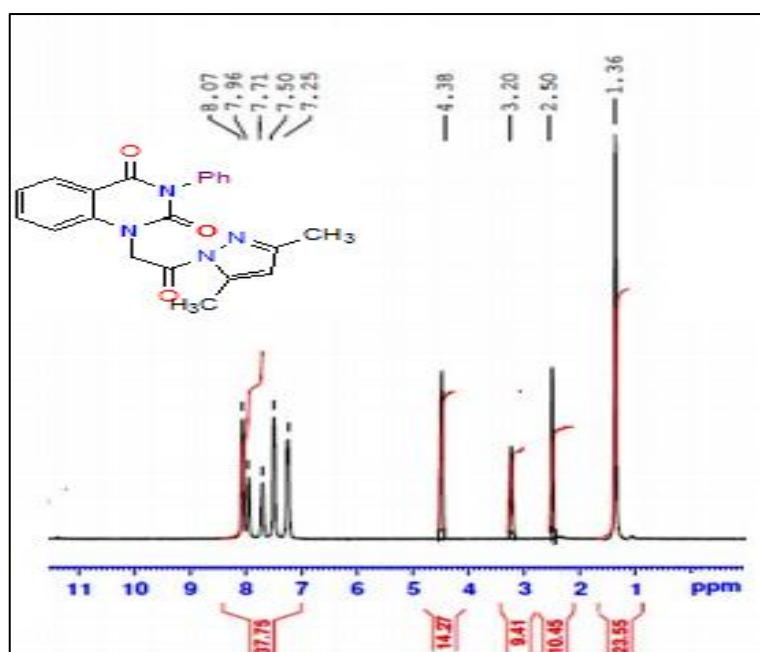

**Figure S4.**  $^1\text{H}$ -NMR of compound 2

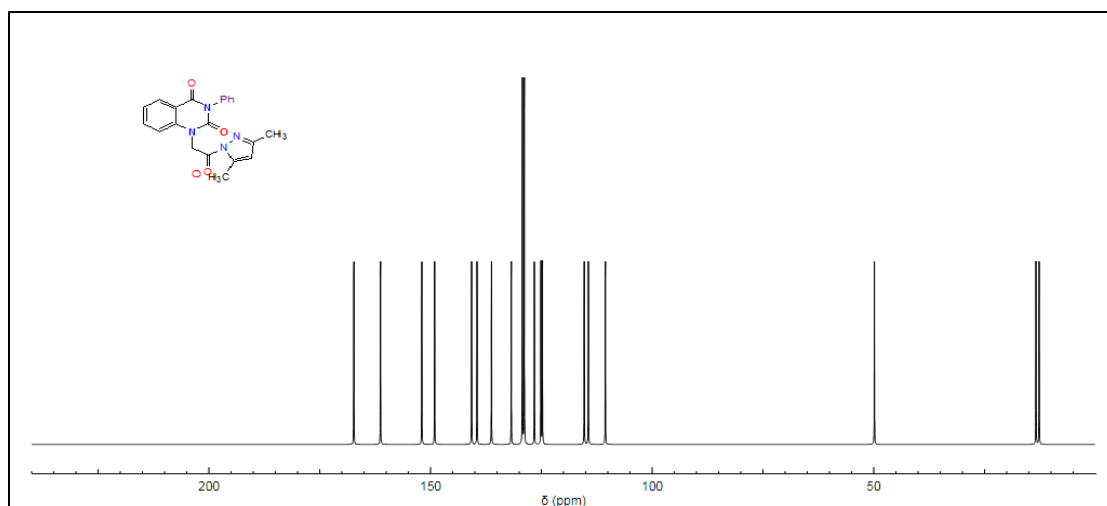

Figure S5.  $^{13}\text{C}$ -NMR of compound 2

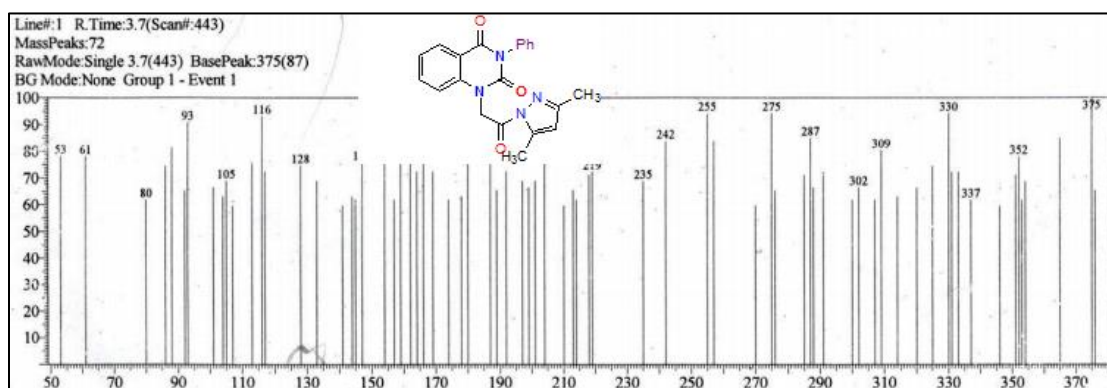

Figure S6. MS of compound 2

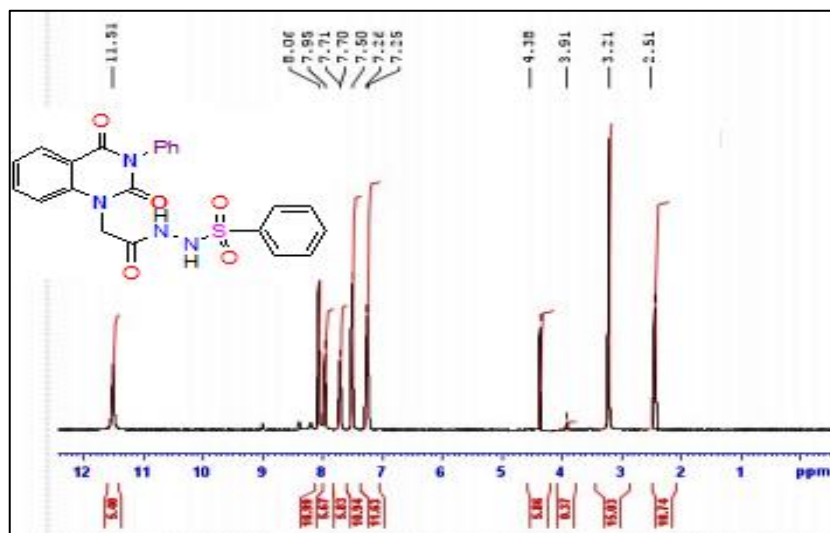

Figure S7.  $^1\text{H}$ -NMR of compound 3

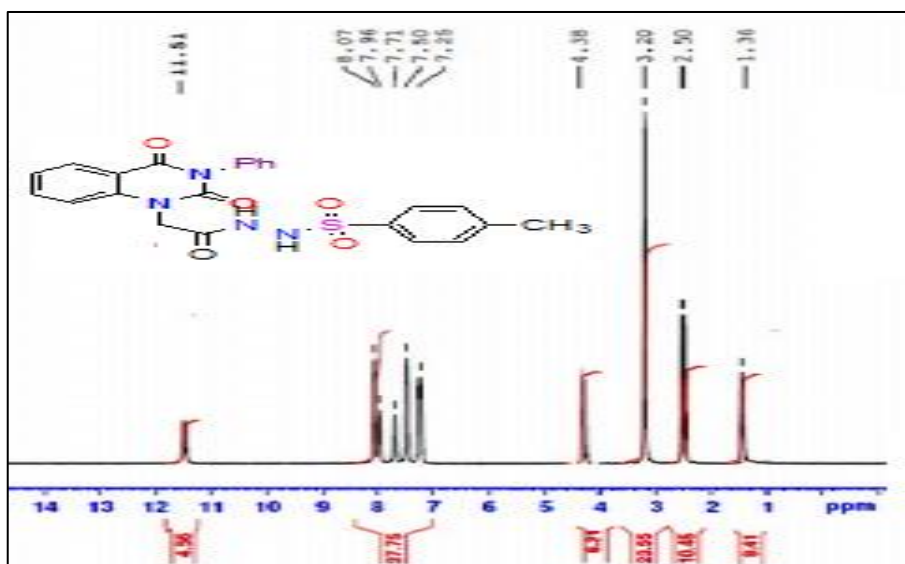

Figure S8. <sup>1</sup>H -NMR of compound 4

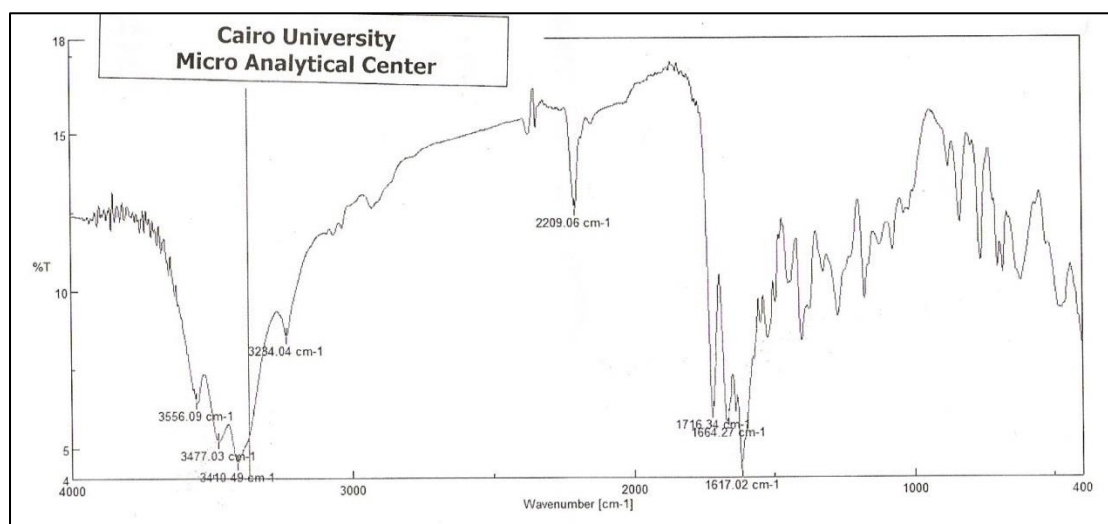

Figure S9. IR of compound 5

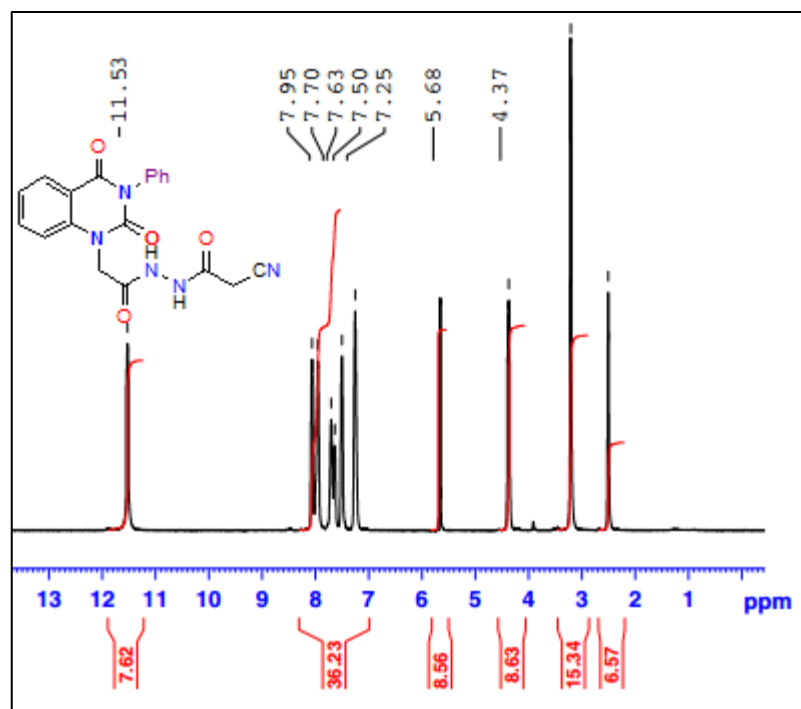

Figure S10. <sup>1</sup>H -NMR of compound 5

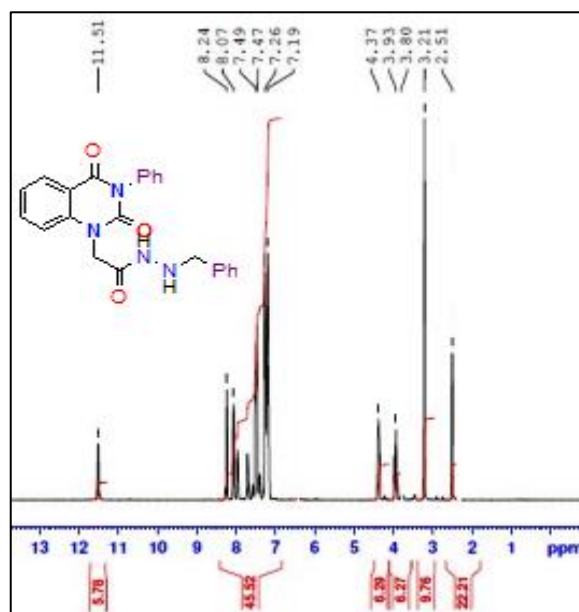

Figure S11. <sup>1</sup>H -NMR of compound 6

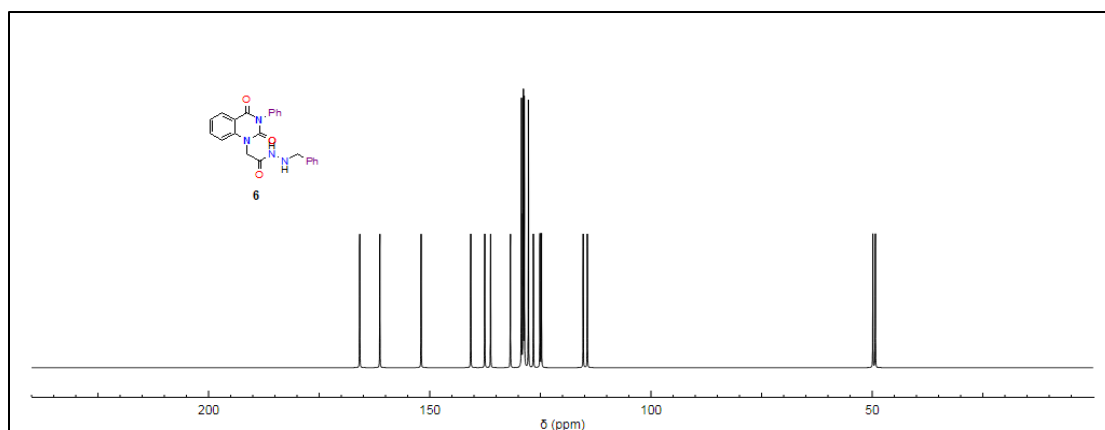

Figure S12.  $^{13}\text{C}$ -NMR of compound 6

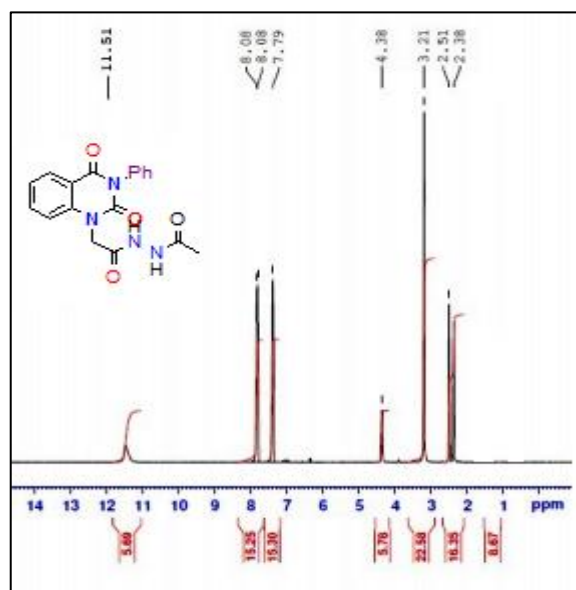

Figure S13.  $^1\text{H}$ -NMR of compound 7

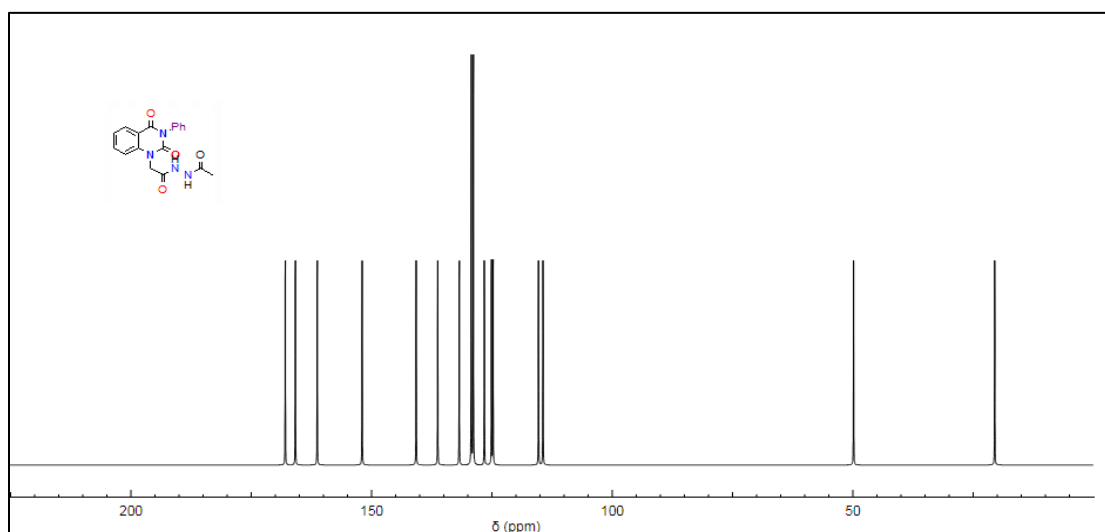

Figure S14.  $^{13}\text{C}$ -NMR of compound 7

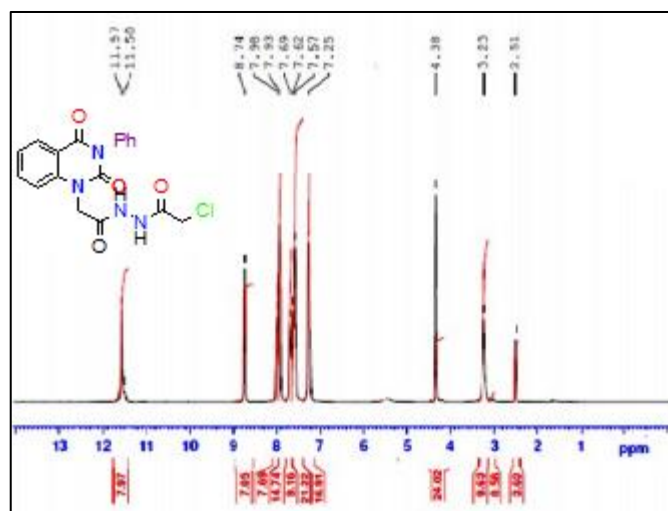

Figure S15.  $^1\text{H}$ -NMR of compound 8

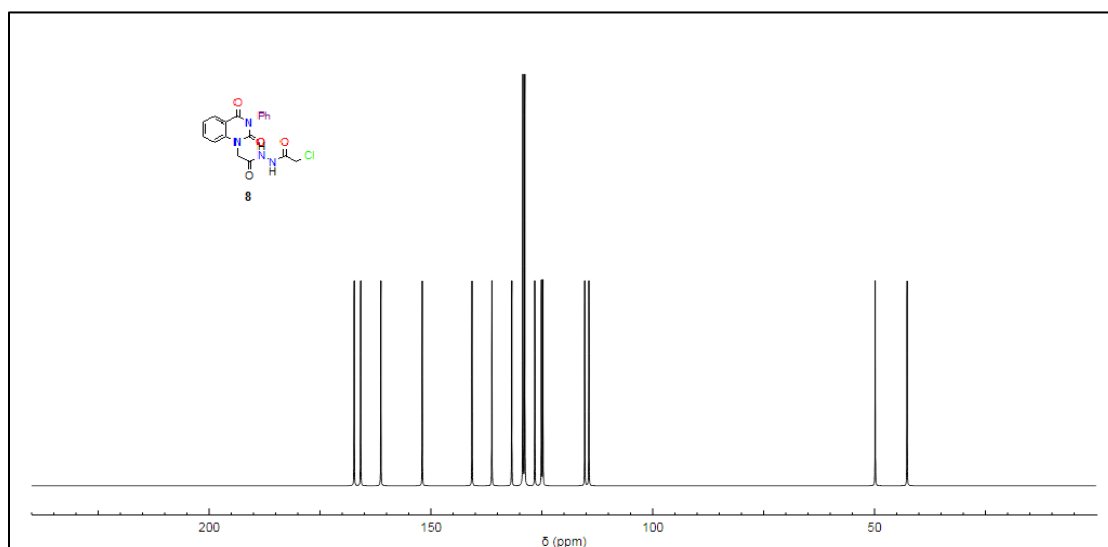

Figure S16.  $^{13}\text{C}$ -NMR of compound 8

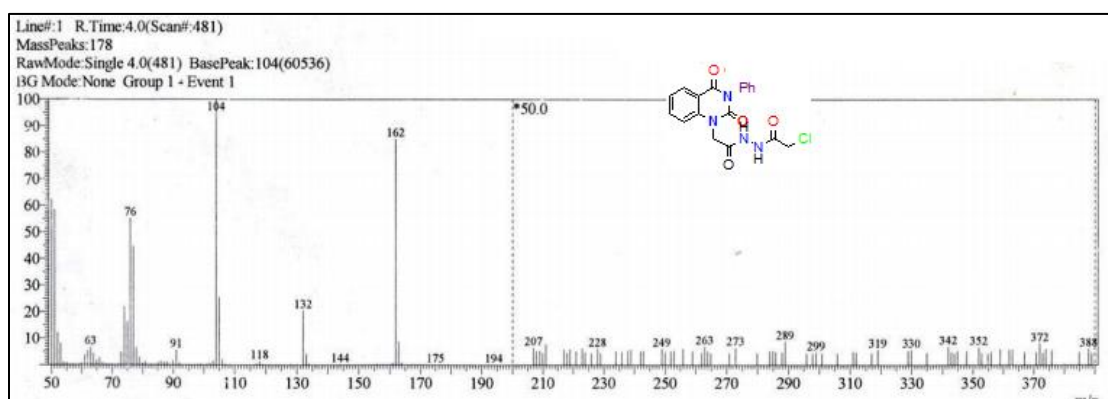

Figure S17. MS of compound 8

**Compound 1**

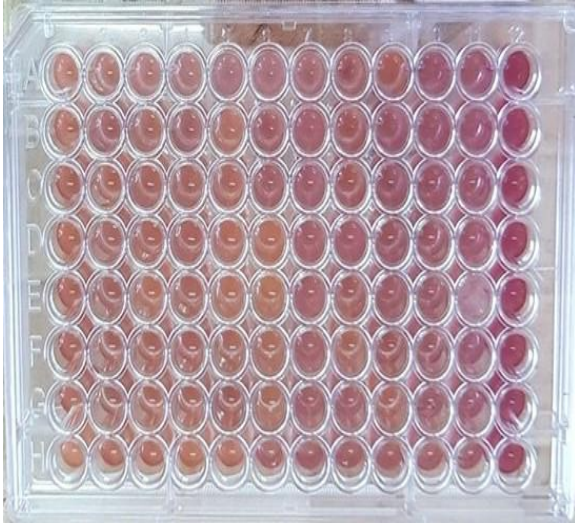

**Compound 2**

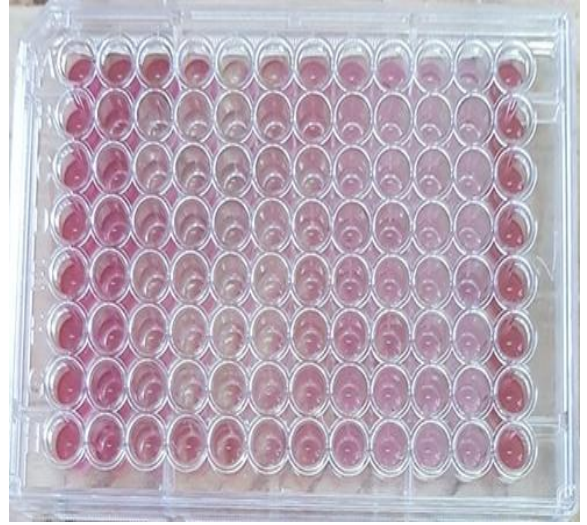

**Compound 3**

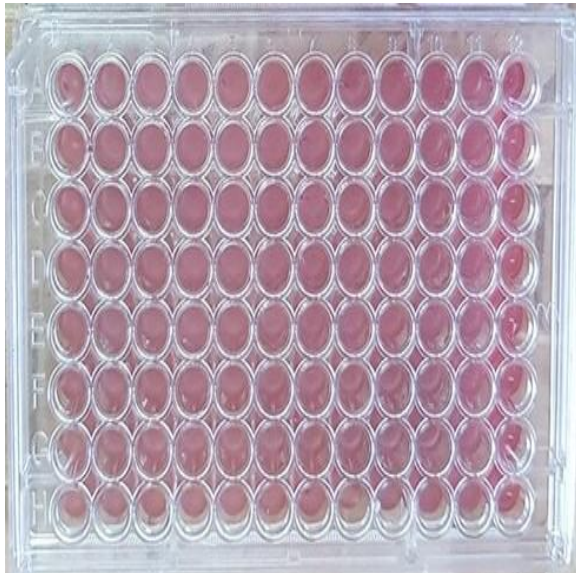

**Compound 4**

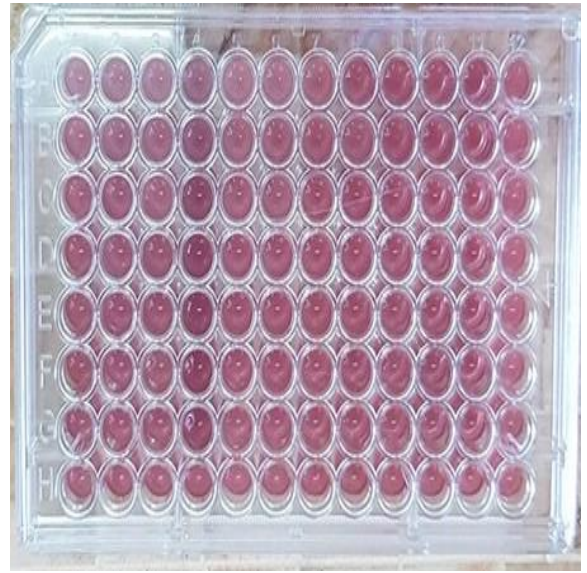



**Compound 5**

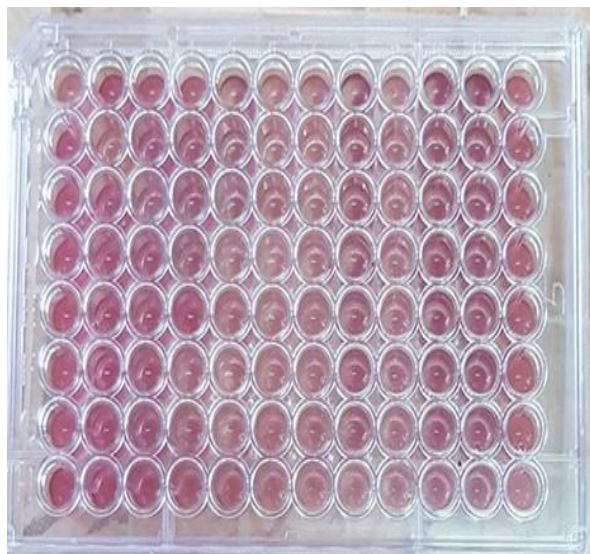

**Compound 6**

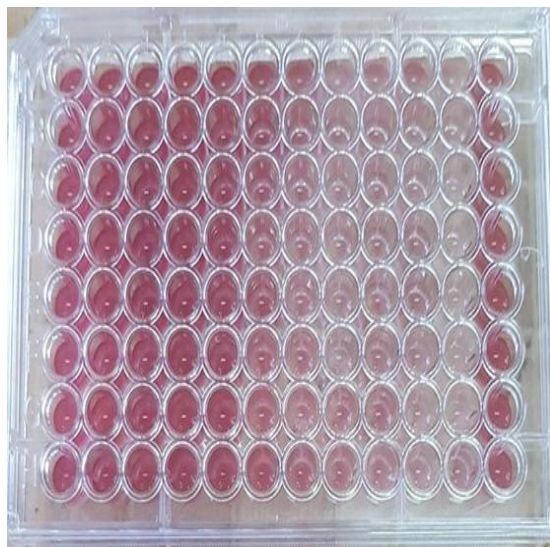

**Compound 7**

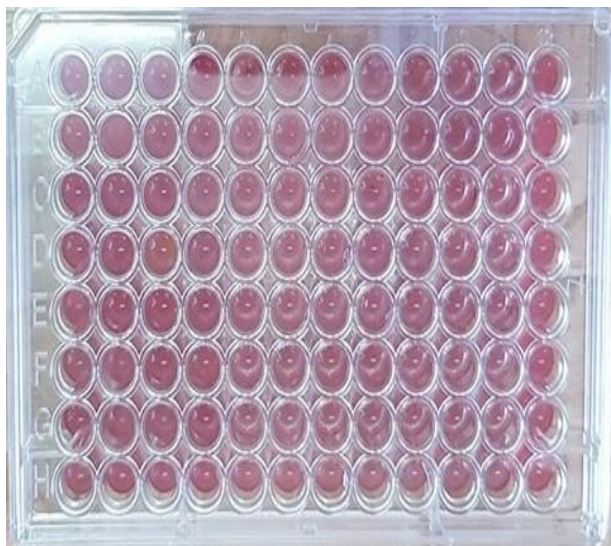

**Compound 8**

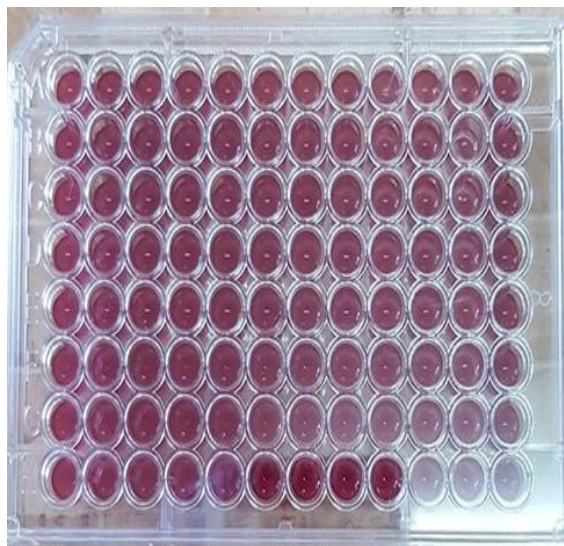

**Figure S18.** Minimum inhibitory concentration (MIC) method of quinazoline-2,4-dione derivatives **1-8** against Gram-negative *Escherichia coli* O78 strain.
